# Supplementary material for: Melt Amorphisation of Orlistat with Mesoporous Silica Using a Supercritical Carbon Dioxide: Effects of Pressure, Temperature, and Drug Loading Ratio and Comparison with Other Conventional Amorphisation Methods
Source: MDPI journal article supplement (doi:10.3390/pharmaceutics12040377), 2020-04-20
Supplement: s1 [file s1]

# Supplementary Materials: Melt Amorphisation of Orlistat with Mesoporous Silica using a Supercritical Carbon Dioxide: Effects of Pressure, Temperature, and Drug Loading Ratio and Comparison with other Conventional Amorphisation Methods

Heejun Park, Kwang-Ho Cha, Seung Hyeon Hong, Sharif Md Abuzar, Eun-Sol Ha, Jeong-Soo Kim, Min-Soo Kim and Sung-Joo Hwang

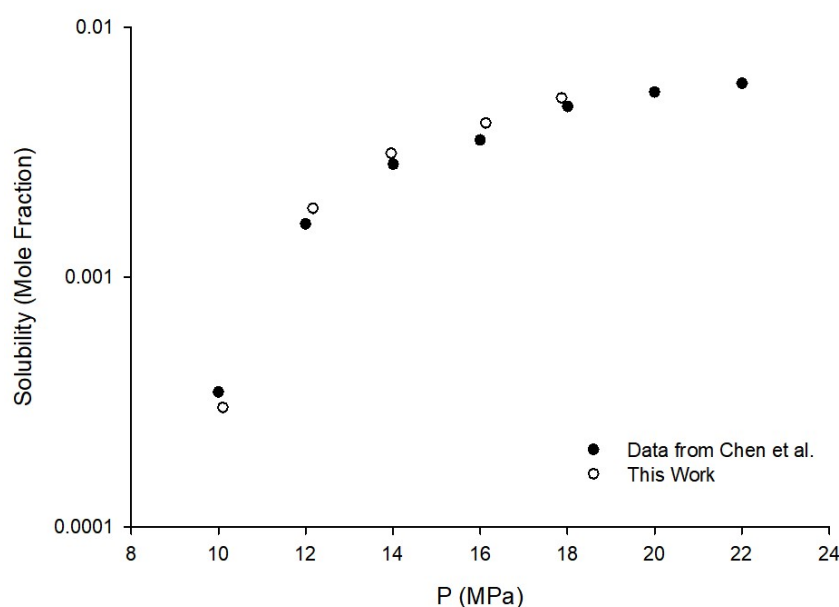

**Figure S1.** Comparison of the solubility data for fenofibrate in SC-CO<sub>2</sub> at 318.15 K reported in the literature [40] and this work.

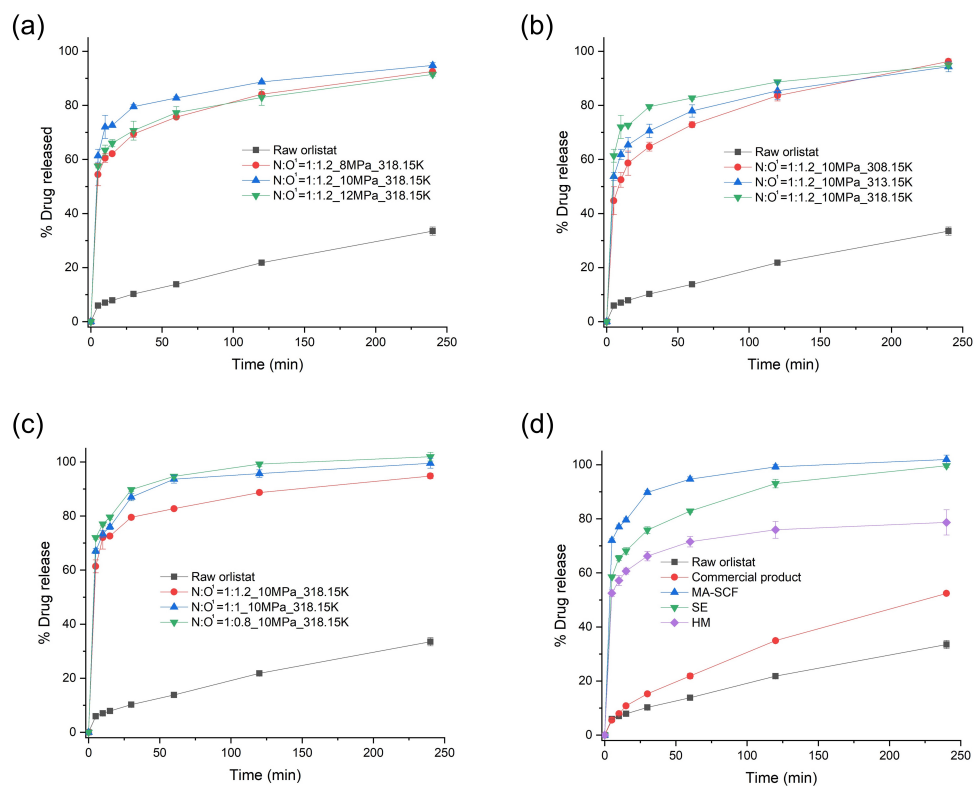

**Figure S2.** Dissolution profiles of orlistat-loaded Neusilin®UFL2: (a) effect of pressure; (b) effect of temperature; and (c) effect of orlistat mass ratio for MA-SCF process; and (d) effect of preparation method. <sup>1</sup>N:O is the mass ratio of Neusilin®UFL2:Orlistat.
